# Supplementary material for: Rapid and On-Scene Chemical Identification of Intact Explosives with Portable Near-Infrared Spectroscopy and Multivariate Data Analysis
Source: MDPI journal article supplement (doi:10.3390/s23083804), 2023-04-07
Supplement: s1 [file s1]

# Supplemental Information

*for*

## Rapid and on-scene chemical identification of intact explosives with portable Near Infrared Spectroscopy and multivariate data analysis

Irene M. van Damme<sup>1,2\*</sup>, Pol Mestres-Fitó<sup>1</sup>, Henk-Jan Ramaker<sup>3</sup>, Annemieke Hulsbergen<sup>2</sup>, Antoine E.D.M. van der Heijden<sup>4</sup>, Ruben F. Kranenburg<sup>1,5</sup>, Arian C. van Asten<sup>1,2,6</sup>

<sup>1</sup> Van 't Hoff Institute for Molecular Sciences, University of Amsterdam, Science Park 904, Amsterdam 1098 XH, The Netherlands

<sup>2</sup> Netherlands Forensic Institute (NFI), Laan van Ypenburg 6, Den Haag 2497 GB, The Netherlands

<sup>3</sup> TIPb, Koningin Wilhelminaplein 30, Amsterdam 1062 KR, The Netherlands

<sup>4</sup> TNO Defence, Safety and Security, Dept. Energetic Materials, Ypenburgse Boslaan 2, 2496 ZA, The Hague, The Netherlands

<sup>5</sup> Dutch National Police, Unit Amsterdam, Forensic Laboratory, Kabelweg 25, Amsterdam 1014 BA, The Netherlands

<sup>6</sup> Co van Ledden Hulsebosch Center (CLHC), Amsterdam Center for Forensic Science and Medicine, Science Park 904, Amsterdam 1098 XH, The Netherlands

\* Corresponding author. *E-mail address:* i.m.vandamme@uva.nl (I.M. van Damme).

### Contents

**Table S1.** Additional information TNO samples

**Table S2.** Explosives matrix for NIR-based identification of explosives in the case work samples using the 3-stage TIPb model

**Figure S1.** SNV-corrected, average NIR spectra (n=5) of a) PETN and ETN (orange and blue trace, respectively) and b) RDX and HMX (orange and blue trace, respectively). Spectral details in the 1350-1625 nm range are shown. The offset has been adjusted to facilitate spectrum comparison.

**Figure S2.** SNV-corrected, average NIR spectra (n=5) of binary mixtures of RDX and PETN in different weight ratios. The offset has been adjusted to stack the NIR spectra.

**Figure S3.** Typical NIR spectra PETN-RDX based plastic explosives from the collection of TNO.

**Table S3.** Model predictions and product information of plastic explosives from the collection of TNO

**Figure S4.** SNV-corrected, average NIR spectra (n=5) of a) SP SRN395, SP SRN357, and dry NC (grey, orange, and blue trace, respectively) and b) SP SRN394, SP SRN306, and SP SRN330 (grey, orange, and blue trace, respectively). The offset has been adjusted to facilitate spectrum comparison. For the SP products in panel a) the LDA-NAS model reported the presence of NC whereas for the SP products in panel b) the results were inconclusive (false negative). More information can be found in the SP database: <https://www.ilrc.ucf.edu/powders/index.php>.

**Figure S5.** Typical NIR signals observed for a) black powder and b) flash powder samples (colors indicate different samples).

**Table S4.** Results of the Powder Puck analysis (individual scans) of the NFI case work samples

**Table S5.** Results of the Powder Puck analysis (individual scans) of the samples from the negatives set

**Table S1.** Additional information TNO samples

| Explosive | Lot / batch nr. | Provider                      | Remarks                                     |
|-----------|-----------------|-------------------------------|---------------------------------------------|
| AN        | TL 644/09       | unknown                       | -                                           |
| HMTD      | -               | Prepared at TNO               | -                                           |
| PA        | TL 882/14       | unknown                       | -                                           |
| Tetryl    | TL 1000/19      | unknown                       | -                                           |
| G12       | TL 946/17       | unknown                       | Black gunpowder                             |
| SFG12     | TL 947/17       | unknown                       | Sulphur free black gunpowder                |
| ETN       | -               | Prepared at TNO               | -                                           |
| ETN       | -               | Prepared at TNO               | -                                           |
| PETN      | TL 859/13       | unknown                       | -                                           |
| PETN      | TL 977/18       | unknown                       | -                                           |
| TATP      | -               | Prepared at TNO               | -                                           |
| TATP      | -               | Prepared at TNO               | -                                           |
| TNT       | TL 916/15       | unknown                       | -                                           |
| TNT       | TL 140/96       | unknown                       | -                                           |
| TNT       | TL 743/11       | unknown                       | -                                           |
| C4        | TL 409/06       | unknown                       | -                                           |
| C4        | TL 136/02       | unknown                       | -                                           |
| DBP       | TL 1104/20      | unknown                       | M7 Type II Paste                            |
| DBP       | 20EM0072        | unknown                       | 8120                                        |
| DBP       | 20EM0050        | unknown                       | 8098                                        |
| NC        | 20043           | unknown                       | NC 58 wet                                   |
| NC        | 20043           | unknown                       | NC 58, dry                                  |
| NC        | PM38 36_14      | unknown                       | NC 64, wet                                  |
| NC        | PM38 36_14      | unknown                       | NC 64, dry                                  |
| Semtex    | TL 909/15       | unknown                       | Semtex 1A                                   |
| Semtex    | TL 1123/21      | unknown                       | Semtex 10                                   |
| Semtex    | TL 908/15       | unknown                       | Semtex 10SE                                 |
| Semtex    | TL 911/15       | unknown                       | Semtex 1H                                   |
| Semtex    | TL 910/15       | unknown                       | Semtex C4                                   |
| HMX       | TL 219/03       | unknown                       | Class 5                                     |
| HMX       | TL 410/06       | unknown                       | Class 5                                     |
| HMX       | TL 450/06       | Dyno Nobel (Norway)           | Class 1                                     |
| HMX       | TL 485/06       | Dyno Nobel (Norway)           | Class 5                                     |
| HMX       | TL 464/07       | Eurencos SA (Sorgues, France) | Class 1                                     |
| HMX       | TL 465/07       | Eurencos SA (Sorgues, France) | Class 5                                     |
| RDX       | TL 105/02       | SNPE (France)                 | Insensitive RDX, class 1 (ca. 150 micron)   |
| RDX       | TL 106/02       | SNPE (France)                 | Insensitive RDX, class 5 (ca. 12-23 micron) |
| RDX       | TL 107/02       | SNPE (France)                 | Standard RDX, class 1 (ca. 150 micron)      |
| RDX       | TL 108/02       | SNPE (France)                 | Standard RDX, class 5 (ca. 12-23 micron)    |
| RDX       | TL 125/02       | Dyno Nobel (Norway)           | Insensitive RDX, class 1 (ca. 150 micron)   |
| RDX       | TL 292/04       | Dyno Nobel (Norway)           | -                                           |
| RDX       | TL 133/96       | unknown                       | ca. 2-10 micron                             |
| RDX       | TL 144/96       | unknown                       | ca. 70-150 micron                           |
| RDX       | TL 168/97       | unknown                       | ca. 250 micron                              |
| RDX       | TL 170/97y      | unknown                       | Class E (ca. 20 micron)                     |
| RDX       | TL 169/97aY     | unknown                       | ca. 300 micron                              |
| RDX       | TL 959/17       | unknown                       | -                                           |
| RDX       | TL 984/18       | unknown                       | -                                           |

**Table S2.** Explosives and energetic raw materials reference matrix for the LDA-NAS model

|    |                    |           |
|----|--------------------|-----------|
| 1  | RDX                | Organic   |
| 2  | HMX                | Organic   |
| 3  | TNT                | Organic   |
| 4  | Tetryl             | Organic   |
| 5  | Picric Acid        | Organic   |
| 6  | Nitrocellulose Dry | Organic   |
| 7  | Nitrocellulose Wet | Organic   |
| 8  | PETN               | Organic   |
| 9  | ETN                | Organic   |
| 10 | TATP Dry           | Organic   |
| 11 | TATP Wet           | Organic   |
| 12 | HMTD               | Organic   |
| 13 | Ammonium Nitrate   | Inorganic |



**Figure S3.** Typical NIR spectra of PETN-RDX based plastic explosives from the collection of TNO

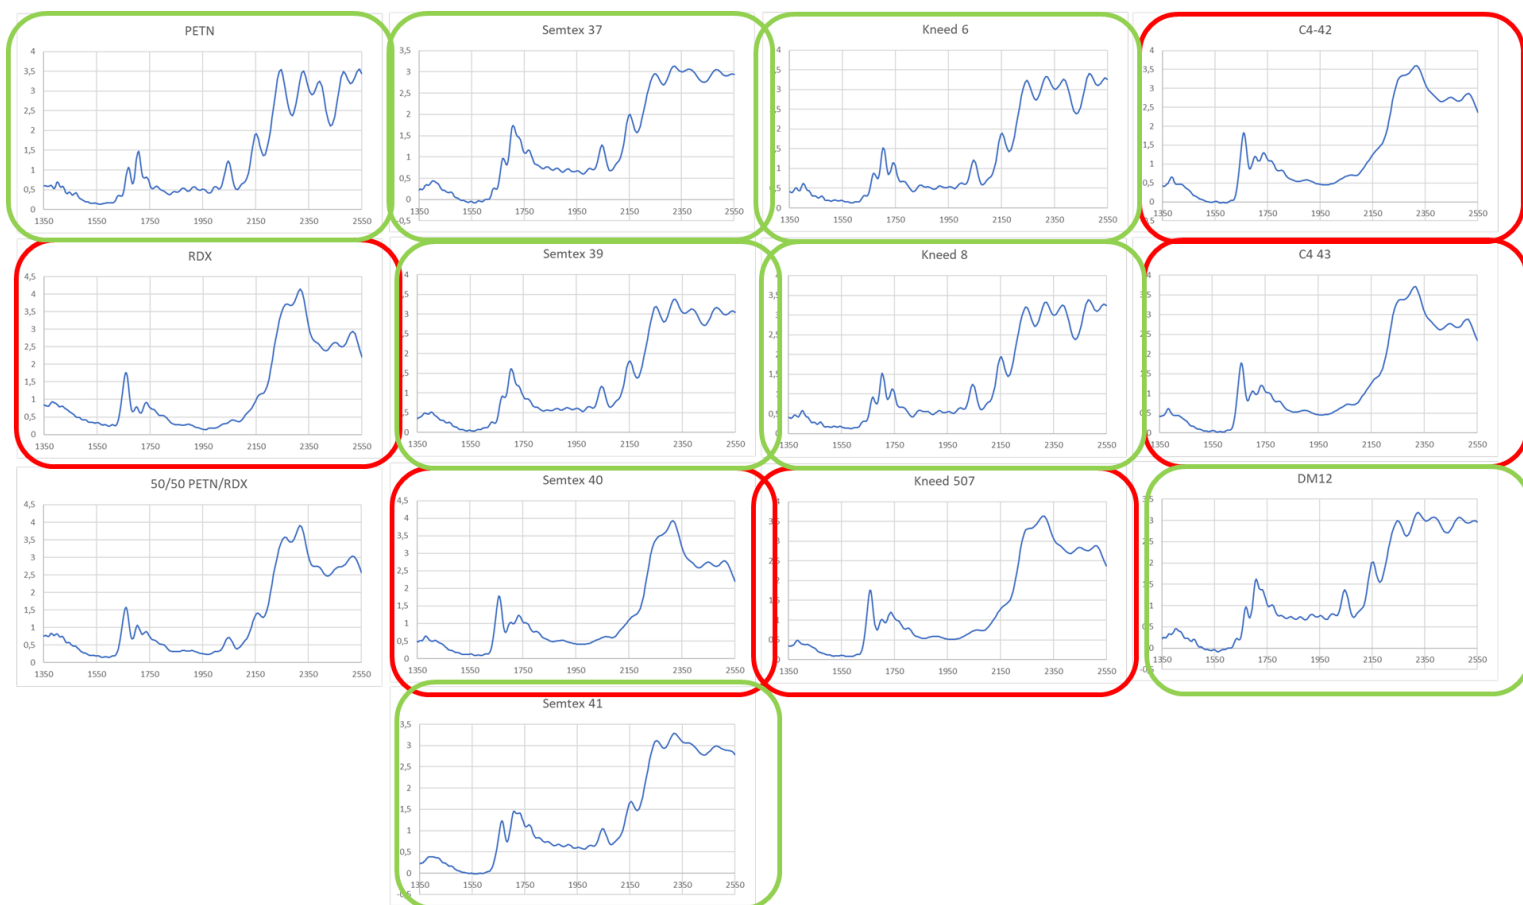

**Table S3.** PLS and LDA-NAS predictions (average value from 5 scans) of RDX/PETN-based plastic explosives from the TNO collection. Typical spectra (labelled as PETN-like or RDX like) can be found in Figure S1.

| Sample ID | NIR spectrum | Product info |           | PLS model  |           | LDA-NAS model |                 |
|-----------|--------------|--------------|-----------|------------|-----------|---------------|-----------------|
|           |              | PETN [wt%]   | RDX [wt%] | PETN [wt%] | RDX [wt%] | PETN [wt%]    | RDX [wt%]       |
| Semtex 37 | PETN-like    | 83           | 0         | 135        | -35       | 36            | -               |
| Semtex 39 | PETN-like    | 78           | 0         | 108        | -8        | 58            | -               |
| Semtex 40 | RDX-like     | ~41          | ~41       | 46         | 54        | -             | 75              |
| Semtex 41 | PETN-like    | 0            | ~90       | 107        | -7        | 32            | 38              |
| DM12      | PETN-like    | 85           | 0         | 133        | -33       | 44            | - <sup>#</sup>  |
| Kneed 6   | PETN-like    | 86           | 0         | 101        | -1        | 64            | -               |
| Kneed 8   | PETN-like    | 86           | 0         | 106        | -6        | 63            | -               |
| Kneed 507 | RDX-like     | 0            | 90        | 67         | 33        | -             | 66              |
| C4 - 42   | RDX-like     | 0            | ~90       | 52         | 48        | -             | 83 <sup>*</sup> |
| C4 - 43   | RDX-like     | 0            | ~90       | 62         | 38        | -             | 80              |

<sup>#</sup> For 1 of the spectra also the presence of 17% RDX was reported

<sup>\*</sup> For 4 of the 5 spectra also the presence of 12% HMX was reported

**Figure S4.** SNV-corrected, average NIR spectra (n=5) of a) SP SRN395, SP SRN357, and dry NC (grey, orange, and blue trace, respectively) and b) SP SRN394, SP SRN306, and SP SRN330 (grey, orange, and blue trace, respectively). The offset has been adjusted to facilitate spectrum comparison. For the SP products in panel a) the LDA-NAS model reported the presence of NC whereas for the SP products in panel b) the results were inconclusive (false negative). The SP samples originate from the Smokeless Powders Database of the National Center for Forensic Science of the University of Central Florida (Orlando, USA), more information on the products can be retrieved by searching the SRN number in the on-line SP database: <https://www.ilrc.ucf.edu/powders/index.php>.

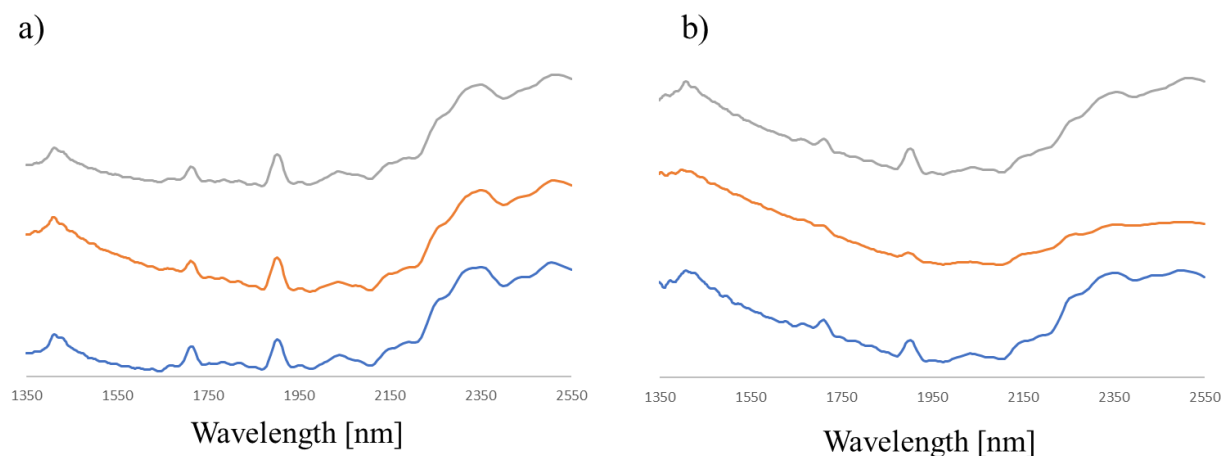

**Figure S5.** Typical NIR signals observed for a) black powder and b) flash powder samples (colors indicate different samples).

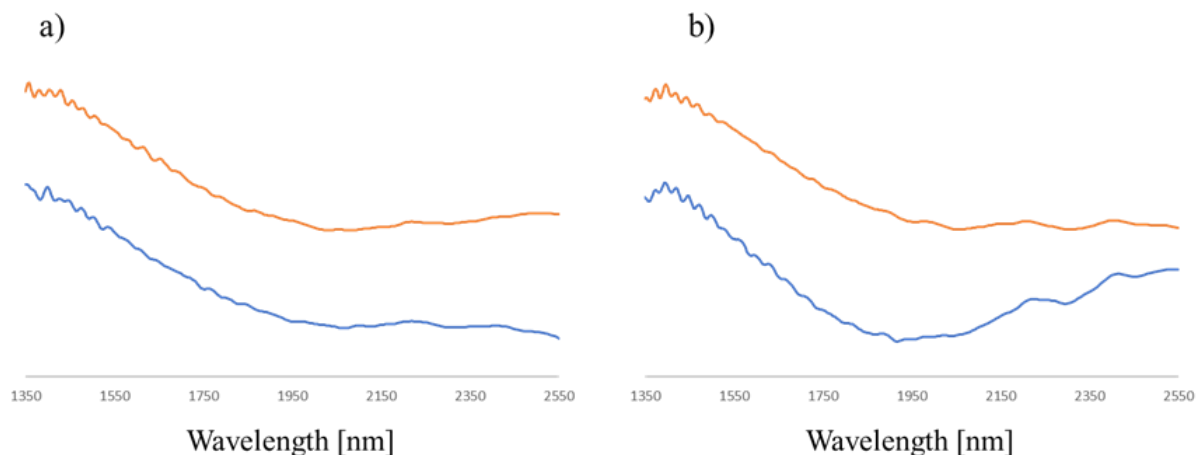

**Table S4.** Results of the Powder Puck analysis of the NFI case work samples  
(Result of individual scans, 5 scans per sample)

| Forensic case sample                    | Power Puck ID                                    | Similarity | Result         |
|-----------------------------------------|--------------------------------------------------|------------|----------------|
| ETN (White Powder)                      | ETN (96%)                                        | 0.96       | true positive  |
| ETN (White Powder)                      | ETN (79%)                                        | 0.98       | true positive  |
| ETN (White Powder)                      | ETN (94%)                                        | 0.94       | true positive  |
| ETN (White Powder)                      | ETN (99%)                                        | 0.99       | true positive  |
| ETN (White Powder)                      | ETN (75%)                                        | 0.97       | true positive  |
| ETN (White Powder/Contaminated)         | ETN (64%)                                        | 0.93       | true positive  |
| ETN (White Powder/Contaminated)         | ETN (65%)                                        | 0.93       | true positive  |
| ETN (White Powder/Contaminated)         | ETN (63%)                                        | 0.92       | true positive  |
| ETN (White Powder/Contaminated)         | ETN (64%)                                        | 0.93       | true positive  |
| ETN (White Powder/Contaminated)         | ETN (62%)                                        | 0.92       | true positive  |
| TATP (White - grey Paste/With IPA)      | Sample not part of model population - no results | 0.70       | false negative |
| TATP (White - grey Paste/With IPA)      | Sample not part of model population - no results | 0.66       | false negative |
| TATP (White - grey Paste/With IPA)      | Sample not part of model population - no results | 0.67       | false negative |
| TATP (White - grey Paste/With IPA)      | Sample not part of model population - no results | 0.66       | false negative |
| TATP (White - grey Paste/With IPA)      | Sample not part of model population - no results | 0.65       | false negative |
| TATP (White - grey Paste/With IPA)      | TATP Dry (19%)                                   | 0.71       | false negative |
| TATP (White - grey Paste/With IPA)      | Sample not part of model population - no results | 0.68       | false negative |
| TATP (White - grey Paste/With IPA)      | Sample not part of model population - no results | 0.64       | false negative |
| TATP (White - grey Paste/With IPA)      | Sample not part of model population - no results | 0.70       | false negative |
| TATP (White - grey Paste/With IPA)      | Sample not part of model population - no results | 0.68       | false negative |
| TATP (White Powder)                     | TATP Dry (92%)                                   | 0.92       | true positive  |
| TATP (White Powder)                     | TATP Dry (63%)                                   | 0.92       | true positive  |
| TATP (White Powder)                     | Sample not part of model population - no results | 0.37       | false negative |
| TATP (White Powder)                     | TATP Dry (64%)                                   | 0.90       | true positive  |
| TATP (White Powder)                     | Sample not part of model population - no results | 0.34       | false negative |
| HMTD (White Powder/Prepared at the NFI) | HMTD (63%)                                       | 0.90       | true positive  |
| HMTD (White Powder/Prepared at the NFI) | HMTD (62%)                                       | 0.91       | true positive  |
| HMTD (White Powder/Prepared at the NFI) | HMTD (62%)                                       | 0.91       | true positive  |
| HMTD (White Powder/Prepared at the NFI) | HMTD (59%)                                       | 0.90       | true positive  |
| HMTD (White Powder/Prepared at the NFI) | HMTD (62%)                                       | 0.90       | true positive  |
| HMTD (White Powder)                     | HMTD (67%)                                       | 0.91       | true positive  |
| HMTD (White Powder)                     | HMTD (70%)                                       | 0.93       | true positive  |



|                          |                                                  |      |                |
|--------------------------|--------------------------------------------------|------|----------------|
| HMTD (White Powder)      | HMTD (71%)                                       | 0.92 | true positive  |
| HMTD (White Powder)      | HMTD (71%)                                       | 0.92 | true positive  |
| HMTD (White Powder)      | HMTD (67%)                                       | 0.93 | true positive  |
| HMTD (White Powder)      | HMTD (69%)                                       | 0.92 | true positive  |
| HMTD (White Powder)      | HMTD (67%)                                       | 0.92 | true positive  |
| HMTD (White Powder)      | HMTD (68%)                                       | 0.92 | true positive  |
| HMTD (White Powder)      | HMTD (68%)                                       | 0.93 | true positive  |
| HMTD (White Powder)      | HMTD (67%)                                       | 0.91 | true positive  |
| HMTD (White Powder)      | HMTD (69%)                                       | 0.93 | true positive  |
| HMTD (White Powder)      | HMTD (69%)                                       | 0.94 | true positive  |
| HMTD (White Powder)      | HMTD (71%)                                       | 0.94 | true positive  |
| HMTD (White Powder)      | HMTD (71%)                                       | 0.94 | true positive  |
| HMTD (White Powder)      | HMTD (68%)                                       | 0.94 | true positive  |
| HMTD (Yellowish Powder)  | HMTD (77%)                                       | 0.95 | true positive  |
| HMTD (Yellowish Powder)  | HMTD (77%)                                       | 0.95 | true positive  |
| HMTD (Yellowish Powder)  | HMTD (95%)                                       | 0.95 | true positive  |
| HMTD (Yellowish Powder)  | HMTD (76%)                                       | 0.95 | true positive  |
| HMTD (Yellowish Powder)  | HMTD (75%)                                       | 0.95 | true positive  |
| HMTD (Yellowish Powder)  | HMTD (77%)                                       | 0.95 | true positive  |
| HMTD (Yellowish Powder)  | HMTD (74%)                                       | 0.94 | true positive  |
| HMTD (Yellowish Powder)  | HMTD (77%)                                       | 0.95 | true positive  |
| HMTD (Yellowish Powder)  | HMTD (75%)                                       | 0.95 | true positive  |
| HMTD (Yellowish Powder)  | HMTD (77%)                                       | 0.94 | true positive  |
| HMTD (Yellowish Powder)  | HMTD (75%)                                       | 0.94 | true positive  |
| HMTD (Yellowish Powder)  | HMTD (76%)                                       | 0.95 | true positive  |
| HMTD (Yellowish Powder)  | HMTD (95%)                                       | 0.95 | true positive  |
| HMTD (Yellowish Powder)  | HMTD (76%)                                       | 0.95 | true positive  |
| HMTD (Yellowish Powder)  | HMTD (95%)                                       | 0.95 | true positive  |
| HMTD (Yellowish Powder)  | HMTD (73%)                                       | 0.94 | true positive  |
| HMTD (Yellowish Powder)  | HMTD (95%)                                       | 0.95 | true positive  |
| HMTD (Yellowish Powder)  | HMTD (95%)                                       | 0.95 | true positive  |
| HMTD (Yellowish Powder)  | HMTD (73%)                                       | 0.93 | true positive  |
| HMTD (Yellowish Powder)  | HMTD (74%)                                       | 0.93 | true positive  |
| HMTD (White Powder)      | HMTD (66%)                                       | 0.90 | true positive  |
| HMTD (White Powder)      | HMTD (89%)                                       | 0.89 | true positive  |
| HMTD (White Powder)      | HMTD (59%)                                       | 0.90 | true positive  |
| HMTD (White Powder)      | HMTD (53%)                                       | 0.87 | true positive  |
| HMTD (White Powder)      | HMTD (64%)                                       | 0.90 | true positive  |
| TATP/HMTD (White Powder) | HMTD (29%)                                       | 0.70 | false negative |
| TATP/HMTD (White Powder) | Sample not part of model population - no results | 0.65 | false negative |
| TATP/HMTD (White Powder) | HMTD (31%)                                       | 0.73 | false negative |
| TATP/HMTD (White Powder) | HMTD (30%)                                       | 0.71 | false negative |

|                                          |                             |      |                |
|------------------------------------------|-----------------------------|------|----------------|
| TATP/HMTD (White Powder)                 | HMTD (34%)                  | 0.74 | false negative |
| TATP/HMTD (White Powder)                 | HMTD (33%)                  | 0.77 | false negative |
| TATP/HMTD (White Powder)                 | HMTD (34%)                  | 0.74 | true positive  |
| TATP/HMTD (White Powder)                 | HMTD (40%)                  | 0.83 | true positive  |
| TATP/HMTD (White Powder)                 | HMTD (38%)                  | 0.83 | true positive  |
| TATP/HMTD (White Powder)                 | HMTD (37%)                  | 0.79 | true positive  |
| TATP/HMTD (White - grey Powder)          | TATP Wet (49%) + HMTD (20%) | 0.89 | true positive  |
| TATP/HMTD (White - grey Powder)          | TATP Dry (61%)              | 0.89 | true positive  |
| TATP/HMTD (White - grey Powder)          | TATP Dry (58%)              | 0.87 | true positive  |
| TATP/HMTD (White - grey Powder)          | TATP Dry (53%) + HMTD (21%) | 0.93 | true positive  |
| TATP/HMTD (White - grey Powder)          | TATP Dry (59%)              | 0.88 | true positive  |
| TATP/HMTD (White Powder/With impurities) | HMTD (34%)                  | 0.81 | true positive  |
| TATP/HMTD (White Powder/With impurities) | HMTD (28%)                  | 0.75 | false negative |
| TATP/HMTD (White Powder/With impurities) | HMTD (24%)                  | 0.77 | false negative |
| TATP/HMTD (White Powder/With impurities) | HMTD (47%) + TATP Wet (16%) | 0.87 | true positive  |
| TATP/HMTD (White Powder/With impurities) | HMTD (33%)                  | 0.78 | false negative |
| PETN (Brown Paste )                      | PETN (44%)                  | 0.92 | true positive  |
| PETN (Brown Paste )                      | PETN (44%)                  | 0.91 | true positive  |
| PETN (Brown Paste )                      | PETN (39%)                  | 0.91 | true positive  |
| PETN (Brown Paste )                      | PETN (42%)                  | 0.91 | true positive  |
| PETN (Brown Paste )                      | PETN (43%)                  | 0.92 | true positive  |
| PETN (Pink Paste)                        | PETN (65%)                  | 0.92 | true positive  |
| PETN (Pink Paste)                        | PETN (64%)                  | 0.92 | true positive  |
| PETN (Pink Paste)                        | PETN (67%)                  | 0.92 | true positive  |
| PETN (Pink Paste)                        | PETN (62%)                  | 0.92 | true positive  |
| PETN (Pink Paste)                        | PETN (65%)                  | 0.92 | true positive  |
| PETN (White Powder)                      | PETN (73%)                  | 0.96 | true positive  |
| PETN (White Powder)                      | PETN (75%)                  | 0.96 | true positive  |
| PETN (White Powder)                      | PETN (69%)                  | 0.95 | true positive  |
| PETN (White Powder)                      | PETN (73%)                  | 0.96 | true positive  |
| PETN (White Powder)                      | PETN (72%)                  | 0.96 | true positive  |
| PETN (Brown Paste)                       | PETN (24%)                  | 0.85 | true positive  |
| PETN (Brown Paste)                       | PETN (15%)                  | 0.82 | true positive  |
| PETN (Brown Paste)                       | PETN (22%)                  | 0.84 | true positive  |
| PETN (Brown Paste)                       | PETN (15%)                  | 0.82 | true positive  |
| PETN (Brown Paste)                       | PETN (20%)                  | 0.84 | true positive  |
| PETN (Yellow Powder)                     | PETN (75%)                  | 0.96 | true positive  |
| PETN (Yellow Powder)                     | PETN (75%) + RDX (12%)      | 0.96 | true positive  |
| PETN (Yellow Powder)                     | PETN (74%) + RDX (13%)      | 0.97 | true positive  |

|                                   |                        |      |                |
|-----------------------------------|------------------------|------|----------------|
| PETN (Yellow Powder)              | PETN (71%)             | 0.96 | true positive  |
| PETN (Yellow Powder)              | PETN (73%) + RDX (14%) | 0.96 | true positive  |
| PETN (Brown Paste)                | PETN (45%)             | 0.90 | true positive  |
| PETN (Brown Paste)                | PETN (59%) + RDX (18%) | 0.94 | true positive  |
| PETN (Brown Paste)                | PETN (37%)             | 0.88 | true positive  |
| PETN (Brown Paste)                | PETN (55%) + RDX (17%) | 0.92 | true positive  |
| PETN (Brown Paste)                | PETN (34%)             | 0.88 | true positive  |
| PETN (Yellow Paste)               | PETN (57%)             | 0.93 | true positive  |
| PETN (Yellow Paste)               | PETN (68%)             | 0.95 | true positive  |
| PETN (Yellow Paste)               | PETN (62%) + RDX (16%) | 0.94 | true positive  |
| PETN (Yellow Paste)               | PETN (94%)             | 0.94 | true positive  |
| PETN (Yellow Paste)               | PETN (55%) + RDX (18%) | 0.92 | true positive  |
| PETN (Yellow - brown Paste)       | PETN (55%) + RDX (18%) | 0.93 | true positive  |
| PETN (Yellow - brown Paste)       | PETN (58%) + RDX (18%) | 0.93 | true positive  |
| PETN (Yellow - brown Paste)       | PETN (94%)             | 0.94 | true positive  |
| PETN (Yellow - brown Paste)       | PETN (51%)             | 0.92 | true positive  |
| PETN (Yellow - brown Paste)       | PETN (37%)             | 0.88 | true positive  |
| RDX (White Paste)                 | RDX (76%)              | 0.96 | true positive  |
| RDX (White Paste)                 | RDX (77%)              | 0.96 | true positive  |
| RDX (White Paste)                 | RDX (76%)              | 0.96 | true positive  |
| RDX (White Paste)                 | RDX (97%)              | 0.97 | true positive  |
| RDX (White Paste)                 | RDX (74%)              | 0.95 | true positive  |
| RDX (Green Paste)                 | RDX (28%)              | 0.80 | true positive  |
| RDX (Green Paste)                 | RDX (30%)              | 0.80 | true positive  |
| RDX (Green Paste)                 | RDX (30%)              | 0.79 | false negative |
| RDX (Green Paste)                 | RDX (29%)              | 0.79 | false negative |
| RDX (Green Paste)                 | RDX (28%)              | 0.78 | false negative |
| RDX (White Paste)                 | RDX (98%)              | 0.98 | true positive  |
| RDX (White Paste)                 | RDX (82%)              | 0.99 | true positive  |
| RDX (White Paste)                 | RDX (96%)              | 0.96 | true positive  |
| RDX (White Paste)                 | RDX (78%)              | 0.98 | true positive  |
| RDX (White Paste)                 | RDX (73%)              | 0.97 | true positive  |
| RDX (White Paste/With impurities) | RDX (99%)              | 0.99 | true positive  |
| RDX (White Paste/With impurities) | RDX (77%)              | 0.98 | true positive  |
| RDX (White Paste/With impurities) | RDX (74%)              | 0.98 | true positive  |
| RDX (White Paste/With impurities) | RDX (82%)              | 0.98 | true positive  |
| RDX (White Paste/With impurities) | RDX (98%)              | 0.98 | true positive  |
| TNT (Yellowish Paste)             | TNT (93%)              | 1    | true positive  |
| TNT (Yellowish Paste)             | TNT (100%)             | 1    | true positive  |
| TNT (Yellowish Paste)             | TNT (100%)             | 1    | true positive  |
| TNT (Yellowish Paste)             | TNT (92%)              | 1    | true positive  |
| TNT (Yellowish Paste)             | TNT (92%)              | 1    | true positive  |
| TNT (Brownish Big pieces)         | TNT (99%)              | 0.99 | true positive  |

|                                   |              |      |               |
|-----------------------------------|--------------|------|---------------|
| TNT (Brownish Big pieces)         | TNT (99%)    | 0.99 | true positive |
| TNT (Brownish Big pieces)         | TNT (100%)   | 1    | true positive |
| TNT (Brownish Big pieces)         | TNT (100%)   | 1    | true positive |
| TNT (Brownish Big pieces)         | TNT (100%)   | 1    | true positive |
| TNT (Brownish Powder)             | TNT (98%)    | 0.98 | true positive |
| TNT (Brownish Powder)             | TNT (96%)    | 0.96 | true positive |
| TNT (Brownish Powder)             | TNT (99%)    | 0.99 | true positive |
| TNT (Brownish Powder)             | TNT (98%)    | 0.98 | true positive |
| TNT (Brownish Powder)             | TNT (73%)    | 0.95 | true positive |
| TNT (Brownish Powder)             | TNT (96%)    | 0.96 | true positive |
| TNT (Brownish Powder)             | TNT (96%)    | 0.96 | true positive |
| TNT (Brownish Powder)             | TNT (96%)    | 0.96 | true positive |
| TNT (Brownish Powder)             | TNT (96%)    | 0.96 | true positive |
| TNT (Brownish Powder)             | TNT (96%)    | 0.96 | true positive |
| TNT (Yellow - brown Small flakes) | TNT (92%)    | 1    | true positive |
| TNT (Yellow - brown Small flakes) | TNT (100%)   | 1    | true positive |
| TNT (Yellow - brown Small flakes) | TNT (100%)   | 1    | true positive |
| TNT (Yellow - brown Small flakes) | TNT (100%)   | 1    | true positive |
| TNT (Yellow - brown Small flakes) | TNT (100%)   | 1    | true positive |
| Tetryl (Grey Small stones)        | Tetryl (91%) | 0.91 | true positive |
| Tetryl (Grey Small stones)        | Tetryl (92%) | 0.92 | true positive |
| Tetryl (Grey Small stones)        | Tetryl (91%) | 0.91 | true positive |
| Tetryl (Grey Small stones)        | Tetryl (89%) | 0.89 | true positive |
| Tetryl (Grey Small stones)        | Tetryl (89%) | 0.89 | true positive |
| Tetryl (Grey Powder)              | Tetryl (93%) | 0.93 | true positive |
| Tetryl (Grey Powder)              | Tetryl (95%) | 0.95 | true positive |
| Tetryl (Grey Powder)              | Tetryl (94%) | 0.94 | true positive |
| Tetryl (Grey Powder)              | Tetryl (91%) | 0.91 | true positive |
| Tetryl (Grey Powder)              | Tetryl (92%) | 0.92 | true positive |
| Tetryl (Grey Powder)              | Tetryl (92%) | 0.92 | true positive |
| Tetryl (Grey Powder)              | Tetryl (95%) | 0.95 | true positive |
| Tetryl (Grey Powder)              | Tetryl (91%) | 0.91 | true positive |
| Tetryl (Grey Powder)              | Tetryl (95%) | 0.95 | true positive |
| Tetryl (Grey Powder)              | Tetryl (94%) | 0.94 | true positive |
| Tetryl (Grey Powder)              | Tetryl (93%) | 0.93 | true positive |
| Tetryl (Grey Powder)              | Tetryl (94%) | 0.94 | true positive |
| Tetryl (Grey Powder)              | Tetryl (94%) | 0.94 | true positive |
| Tetryl (Grey Powder)              | Tetryl (94%) | 0.94 | true positive |
| Tetryl (Grey Powder)              | Tetryl (92%) | 0.92 | true positive |
| Tetryl (Grey Powder)              | Tetryl (92%) | 0.92 | true positive |
| Tetryl (Grey Powder)              | Tetryl (94%) | 0.94 | true positive |
| Tetryl (Grey Powder)              | Tetryl (92%) | 0.92 | true positive |
| Tetryl (Grey Powder)              | Tetryl (94%) | 0.94 | true positive |

|                                              |                                                  |      |               |
|----------------------------------------------|--------------------------------------------------|------|---------------|
| Tetryl (Grey Powder)                         | Tetryl (95%)                                     | 0.95 | true positive |
| Tetryl (Grey Powder)                         | Tetryl (92%)                                     | 0.92 | true positive |
| Tetryl (Grey Powder)                         | Tetryl (91%)                                     | 0.91 | true positive |
| Tetryl (Grey Powder)                         | Tetryl (93%)                                     | 0.93 | true positive |
| Tetryl (Grey Powder)                         | Tetryl (95%)                                     | 0.95 | true positive |
| Tetryl (Grey Powder)                         | Tetryl (93%)                                     | 0.93 | true positive |
| Tetryl (Grey Powder)                         | Tetryl (89%)                                     | 0.89 | true positive |
| Tetryl (Grey Powder)                         | Tetryl (92%)                                     | 0.92 | true positive |
| Tetryl (Grey Powder)                         | Tetryl (97%)                                     | 0.97 | true positive |
| Tetryl (Grey Powder)                         | Tetryl (93%)                                     | 0.93 | true positive |
| Tetryl (Grey Powder)                         | Tetryl (95%)                                     | 0.95 | true positive |
| Tetryl (Grey Powder)                         | Tetryl (94%)                                     | 0.94 | true positive |
| Tetryl (Grey Powder)                         | Tetryl (91%)                                     | 0.91 | true positive |
| Tetryl (Grey Powder)                         | Tetryl (94%)                                     | 0.94 | true positive |
| Tetryl (Grey Powder)                         | Tetryl (66%) + Picric Acid (21%)                 | 0.87 | true positive |
| Tetryl (Grey Powder)                         | Tetryl (90%)                                     | 0.90 | true positive |
| Tetryl (Grey Powder)                         | Tetryl (93%)                                     | 0.93 | true positive |
| Tetryl (Grey Powder)                         | Tetryl (92%)                                     | 0.92 | true positive |
| Tetryl (Grey Powder)                         | Tetryl (94%)                                     | 0.94 | true positive |
| Tetryl (Grey Powder)                         | Tetryl (94%)                                     | 0.94 | true positive |
| Tetryl (Grey Powder)                         | Tetryl (89%)                                     | 0.89 | true positive |
| Tetryl (Grey Powder)                         | Tetryl (93%)                                     | 0.93 | true positive |
| Tetryl (Grey Powder)                         | Tetryl (94%)                                     | 0.94 | true positive |
| Tetryl (Grey Powder)                         | Tetryl (89%)                                     | 0.89 | true positive |
| Tetryl (Grey Powder)                         | Tetryl (91%)                                     | 0.91 | true positive |
| Tetryl (Grey Powder)                         | Tetryl (94%)                                     | 0.94 | true positive |
| Ureumnitrate (White Powder)                  | Sample not part of model population - no results | 0    | true negative |
| Ureumnitrate (White Powder)                  | Sample not part of model population - no results | 0    | true negative |
| Ureumnitrate (White Powder)                  | Sample not part of model population - no results | 0    | true negative |
| Ureumnitrate (White Powder)                  | Sample not part of model population - no results | 0    | true negative |
| Ureumnitrate (White Powder)                  | Sample not part of model population - no results | 0    | true negative |
| Ammonium nitrate (White - grey Powder/Dirty) | Ammonium Nitrate (94%)                           | 0.94 | true positive |
| Ammonium nitrate (White - grey Powder/Dirty) | Ammonium Nitrate (66%)                           | 0.94 | true positive |
| Ammonium nitrate (White - grey Powder/Dirty) | Ammonium Nitrate (62%)                           | 0.93 | true positive |
| Ammonium nitrate (White - grey Powder/Dirty) | Ammonium Nitrate (66%)                           | 0.93 | true positive |
| Ammonium nitrate (White - grey Powder/Dirty) | Ammonium Nitrate (60%)                           | 0.91 | true positive |



|                                                     |                                                   |      |                |
|-----------------------------------------------------|---------------------------------------------------|------|----------------|
| Ammonium nitrate (Yellowish Powder/Dirty)           | Ammonium Nitrate (53%)                            | 0.89 | true positive  |
| Ammonium nitrate (White Powder/A bit dirty)         | Ammonium Nitrate (55%)                            | 0.90 | true positive  |
| Ammonium nitrate (White Powder/A bit dirty)         | Ammonium Nitrate (57%)                            | 0.90 | true positive  |
| Ammonium nitrate (White Powder/A bit dirty)         | Ammonium Nitrate (54%)                            | 0.89 | true positive  |
| Ammonium nitrate (White Powder/A bit dirty)         | Ammonium Nitrate (55%)                            | 0.90 | true positive  |
| Ammonium nitrate (White Powder/A bit dirty)         | Ammonium Nitrate (55%)                            | 0.90 | true positive  |
| Ammonium nitrate (White Powder/Looks quite pure)    | Ammonium Nitrate (54%)                            | 0.90 | true positive  |
| Ammonium nitrate (White Powder/Looks quite pure)    | Ammonium Nitrate (45%)                            | 0.85 | true positive  |
| Ammonium nitrate (White Powder/Looks quite pure)    | Ammonium Nitrate (52%)                            | 0.88 | true positive  |
| Ammonium nitrate (White Powder/Looks quite pure)    | Ammonium Nitrate (50%)                            | 0.88 | true positive  |
| Ammonium nitrate (White Powder/Looks quite pure)    | Ammonium Nitrate (50%)                            | 0.88 | true positive  |
| Ammonium nitrate (White Powder/Looks quite pure)    | Ammonium Nitrate (63%)                            | 0.91 | true positive  |
| Ammonium nitrate (White Powder/Looks quite pure)    | Ammonium Nitrate (41%)                            | 0.83 | true positive  |
| Ammonium nitrate (White Powder/Looks quite pure)    | Ammonium Nitrate (62%)                            | 0.92 | true positive  |
| Ammonium nitrate (White Powder/Looks quite pure)    | Ammonium Nitrate (67%)                            | 0.93 | true positive  |
| Ammonium nitrate (White Powder/Looks quite pure)    | Ammonium Nitrate (66%)                            | 0.93 | true positive  |
| Ammonium nitrate (White Powder/From Sigma-Aldrich)  | Ammonium Nitrate (52%)                            | 0.89 | true positive  |
| Ammonium nitrate (White Powder/From Sigma-Aldrich)  | Ammonium Nitrate (23%)                            | 0.73 | false negative |
| Ammonium nitrate (White Powder/From Sigma-Aldrich)  | Ammonium Nitrate (51%)                            | 0.87 | true positive  |
| Ammonium nitrate (White Powder/From Sigma-Aldrich)  | Ammonium Nitrate (49%)                            | 0.88 | true positive  |
| Ammonium nitrate (White Powder/From Sigma-Aldrich)  | Ammonium Nitrate (47%)                            | 0.86 | true positive  |
| Vitezit (Red Paste)                                 | Ammonium Nitrate (53%) + Nitrocellulose Wet ( 6%) | 0.82 | true positive  |
| Vitezit (Red Paste)                                 | Ammonium Nitrate (51%) + Nitrocellulose Wet ( 6%) | 0.80 | true positive  |
| Vitezit (Red Paste)                                 | Ammonium Nitrate (27%)                            | 0.77 | false negative |
| Vitezit (Red Paste)                                 | Ammonium Nitrate (29%)                            | 0.75 | false negative |
| Vitezit (Red Paste)                                 | Ammonium Nitrate (26%)                            | 0.72 | false negative |
| Vitezit (Red Paste)                                 | Ammonium Nitrate (33%)                            | 0.75 | false negative |
| Vitezit (Red Paste)                                 | Ammonium Nitrate (38%)                            | 0.78 | false negative |
| Vitezit (Red Paste)                                 | Ammonium Nitrate (34%)                            | 0.76 | false negative |
| Vitezit (Red Paste)                                 | Ammonium Nitrate (36%)                            | 0.77 | false negative |
| Vitezit (Red Paste)                                 | Ammonium Nitrate (36%)                            | 0.76 | false negative |
| Nitrocellulose (White - yellow Powder/10 years old) | Sample not part of model population - no results  | 0.24 | false negative |

|                                                         |                                                     |      |                |
|---------------------------------------------------------|-----------------------------------------------------|------|----------------|
| Nitrocellulose (White - yellow Powder/10 years old)     | Sample not part of model population - no results    | 0.24 | false negative |
| Nitrocellulose (White - yellow Powder/10 years old)     | Sample not part of model population - no results    | 0.28 | false negative |
| Nitrocellulose (White - yellow Powder/10 years old)     | Sample not part of model population - no results    | 0.26 | false negative |
| Nitrocellulose (White - yellow Powder/10 years old)     | Sample not part of model population - no results    | 0.24 | false negative |
| Nitrocellulose (Yellow Powder/20 years old)             | Nitrocellulose Dry (58%) + Nitrocellulose Wet (32%) | 0.98 | true positive  |
| Nitrocellulose (Yellow Powder/20 years old)             | Nitrocellulose Dry (62%) + Nitrocellulose Wet (28%) | 0.98 | true positive  |
| Nitrocellulose (Yellow Powder/20 years old)             | Nitrocellulose Dry (59%) + Nitrocellulose Wet (31%) | 0.98 | true positive  |
| Nitrocellulose (Yellow Powder/20 years old)             | Nitrocellulose Dry (59%) + Nitrocellulose Wet (33%) | 0.98 | true positive  |
| Nitrocellulose (Yellow Powder/20 years old)             | Nitrocellulose Dry (60%) + Nitrocellulose Wet (31%) | 0.99 | true positive  |
| Nitrocellulose (White Powder)                           | Sample not part of model population - no results    | 0.28 | false negative |
| Nitrocellulose (White Powder)                           | Sample not part of model population - no results    | 0.28 | false negative |
| Nitrocellulose (White Powder)                           | Sample not part of model population - no results    | 0.28 | false negative |
| Nitrocellulose (White Powder)                           | Sample not part of model population - no results    | 0.28 | false negative |
| Nitrocellulose (White Powder)                           | Sample not part of model population - no results    | 0.28 | false negative |
| Nitrocellulose (Yellow Small cylinders/Small cylinders) | Nitrocellulose Dry (83%)                            | 0.99 | true positive  |
| Nitrocellulose (Yellow Small cylinders/Small cylinders) | Nitrocellulose Dry (98%)                            | 0.98 | true positive  |
| Nitrocellulose (Yellow Small cylinders/Small cylinders) | Nitrocellulose Dry (99%)                            | 0.99 | true positive  |
| Nitrocellulose (Yellow Small cylinders/Small cylinders) | Nitrocellulose Dry (99%)                            | 0.99 | true positive  |
| Nitrocellulose (Yellow Small cylinders/Small cylinders) | Nitrocellulose Dry (99%)                            | 0.99 | true positive  |



**Table S5.** Results of the Powder Puck analysis (individual scans) of the samples from the negatives set  
(Result of individual scans, 5 scans per sample)

| Sample          | Power Puck ID                                    | Similarity |
|-----------------|--------------------------------------------------|------------|
| 3-MMC           | Sample not part of model population - no results | 0.25       |
| 3-MMC           | Sample not part of model population - no results | 0.21       |
| 3-MMC           | Sample not part of model population - no results | 0.24       |
| 3-MMC           | Sample not part of model population - no results | 0.24       |
| 3-MMC           | Sample not part of model population - no results | 0.25       |
| Amphetamine (1) | Sample not part of model population - no results | 0.47       |
| Amphetamine (1) | Sample not part of model population - no results | 0.46       |
| Amphetamine (1) | Sample not part of model population - no results | 0.49       |
| Amphetamine (1) | Sample not part of model population - no results | 0.48       |
| Amphetamine (1) | Sample not part of model population - no results | 0.49       |
| Amphetamine (2) | Sample not part of model population - no results | 0.46       |
| Amphetamine (2) | Sample not part of model population - no results | 0.46       |
| Amphetamine (2) | Sample not part of model population - no results | 0.47       |
| Amphetamine (2) | Sample not part of model population - no results | 0.44       |
| Amphetamine (2) | Sample not part of model population - no results | 0.47       |
| Aspirine        | Sample not part of model population - no results | 0.00       |
| Aspirine        | Sample not part of model population - no results | 0.00       |
| Aspirine        | Sample not part of model population - no results | 0.00       |
| Aspirine        | Sample not part of model population - no results | 0.00       |
| Aspirine        | Sample not part of model population - no results | 0.00       |
| Benzocaine      | Sample not part of model population - no results | 0.00       |
| Benzocaine      | Sample not part of model population - no results | 0.00       |
| Benzocaine      | Sample not part of model population - no results | 0.00       |
| Benzocaine      | Sample not part of model population - no results | 0.00       |
| Benzocaine      | Sample not part of model population - no results | 0.00       |
| Boric Acid      | Sample not part of model population - no results | 0.00       |
| Boric Acid      | Sample not part of model population - no results | 0.00       |
| Boric Acid      | Sample not part of model population - no results | 0.00       |
| Boric Acid      | Sample not part of model population - no results | 0.00       |
| Boric Acid      | Sample not part of model population - no results | 0.00       |
| Brown Heroin    | Sample not part of model population - no results | 0.55       |
| Brown Heroin    | Sample not part of model population - no results | 0.54       |
| Brown Heroin    | Sample not part of model population - no results | 0.53       |
| Brown Heroin    | Sample not part of model population - no results | 0.54       |
| Brown Heroin    | Sample not part of model population - no results | 0.53       |
| Levamisole (1)  | Sample not part of model population - no results | 0.38       |
| Levamisole (1)  | Sample not part of model population - no results | 0.38       |
| Levamisole (1)  | Sample not part of model population - no results | 0.39       |
| Levamisole (1)  | Sample not part of model population - no results | 0.36       |









|                 |                                                  |      |
|-----------------|--------------------------------------------------|------|
| Agar Agar       | Sample not part of model population - no results | 0.31 |
| Agar Agar       | Sample not part of model population - no results | 0.29 |
| Agar Agar       | Sample not part of model population - no results | 0.30 |
| Agar Agar       | Sample not part of model population - no results | 0.31 |
| Agar Agar       | Sample not part of model population - no results | 0.28 |
| Baking Powder   | Sample not part of model population - no results | 0.00 |
| Baking Powder   | Sample not part of model population - no results | 0.00 |
| Baking Powder   | Sample not part of model population - no results | 0.00 |
| Baking Powder   | Sample not part of model population - no results | 0.00 |
| Baking Powder   | Sample not part of model population - no results | 0.00 |
| Baking Soda     | Sample not part of model population - no results | 0.00 |
| Baking Soda     | Sample not part of model population - no results | 0.00 |
| Baking Soda     | Sample not part of model population - no results | 0.00 |
| Baking Soda     | Sample not part of model population - no results | 0.00 |
| Baking Soda     | Sample not part of model population - no results | 0.00 |
| Coffee Creamer  | Sample not part of model population - no results | 0.00 |
| Coffee Creamer  | Sample not part of model population - no results | 0.00 |
| Coffee Creamer  | Sample not part of model population - no results | 0.00 |
| Coffee Creamer  | Sample not part of model population - no results | 0.00 |
| Coffee Creamer  | Sample not part of model population - no results | 0.20 |
| Pain Killer (1) | Sample not part of model population - no results | 0.22 |
| Pain Killer (1) | Sample not part of model population - no results | 0.00 |
| Pain Killer (1) | Sample not part of model population - no results | 0.00 |
| Pain Killer (1) | Sample not part of model population - no results | 0.00 |
| Pain Killer (1) | Sample not part of model population - no results | 0.22 |
| Erythritol      | Sample not part of model population - no results | 0.19 |
| Erythritol      | Sample not part of model population - no results | 0.15 |
| Erythritol      | Sample not part of model population - no results | 0.16 |
| Erythritol      | Sample not part of model population - no results | 0.19 |
| Erythritol      | Sample not part of model population - no results | 0.22 |
| Fondant         | Sample not part of model population - no results | 0.18 |
| Fondant         | Sample not part of model population - no results | 0.21 |
| Fondant         | Sample not part of model population - no results | 0.20 |
| Fondant         | Sample not part of model population - no results | 0.20 |
| Fondant         | Sample not part of model population - no results | 0.19 |
| Corn starch     | Sample not part of model population - no results | 0.22 |
| Corn starch     | Sample not part of model population - no results | 0.22 |
| Corn starch     | Sample not part of model population - no results | 0.22 |
| Corn starch     | Sample not part of model population - no results | 0.23 |
| Corn starch     | Sample not part of model population - no results | 0.22 |
| Playdough clay  | Sample not part of model population - no results | 0.30 |
| Playdough clay  | Sample not part of model population - no results | 0.17 |
| Playdough clay  | Sample not part of model population - no results | 0.33 |

|                                |                                                  |      |
|--------------------------------|--------------------------------------------------|------|
| Playdough clay                 | Sample not part of model population - no results | 0.24 |
| Playdough clay                 | Sample not part of model population - no results | 0.31 |
| Powdered sugar                 | Sample not part of model population - no results | 0.33 |
| Powdered sugar                 | Sample not part of model population - no results | 0.31 |
| Powdered sugar                 | Sample not part of model population - no results | 0.32 |
| Powdered sugar                 | Sample not part of model population - no results | 0.31 |
| Powdered sugar                 | Sample not part of model population - no results | 0.31 |
| Salt                           | Sample not part of model population - no results | 0.00 |
| Salt                           | Sample not part of model population - no results | 0.00 |
| Salt                           | Sample not part of model population - no results | 0.00 |
| Salt                           | Sample not part of model population - no results | 0.00 |
| Salt                           | Sample not part of model population - no results | 0.00 |
| Sugar                          | Sample not part of model population - no results | 0.28 |
| Sugar                          | Sample not part of model population - no results | 0.15 |
| Sugar                          | Sample not part of model population - no results | 0.30 |
| Sugar                          | Sample not part of model population - no results | 0.29 |
| Sugar                          | Sample not part of model population - no results | 0.29 |
| Vetsin (Mono-sodium glutamate) | Sample not part of model population - no results | 0.00 |
| Vetsin (Mono-sodium glutamate) | Sample not part of model population - no results | 0.00 |
| Vetsin (Mono-sodium glutamate) | Sample not part of model population - no results | 0.00 |
| Vetsin (Mono-sodium glutamate) | Sample not part of model population - no results | 0.00 |
| Vetsin (Mono-sodium glutamate) | Sample not part of model population - no results | 0.00 |
| Vetsin (Mono-sodium glutamate) | Sample not part of model population - no results | 0.00 |
| Washing detergent              | Sample not part of model population - no results | 0.26 |
| Washing detergent              | Sample not part of model population - no results | 0.26 |
| Washing detergent              | Sample not part of model population - no results | 0.27 |
| Washing detergent              | Sample not part of model population - no results | 0.26 |
| Washing detergent              | Sample not part of model population - no results | 0.26 |
| Wheat flour                    | Sample not part of model population - no results | 0.20 |
| Wheat flour                    | Sample not part of model population - no results | 0.22 |
| Wheat flour                    | Sample not part of model population - no results | 0.22 |
| Wheat flour                    | Sample not part of model population - no results | 0.22 |
| Wheat flour                    | Sample not part of model population - no results | 0.20 |
| Pain Killer (2)                | Sample not part of model population - no results | 0.43 |
| Pain Killer (2)                | Sample not part of model population - no results | 0.44 |
| Pain Killer (2)                | Sample not part of model population - no results | 0.44 |
| Pain Killer (2)                | Sample not part of model population - no results | 0.44 |
| Pain Killer (2)                | Sample not part of model population - no results | 0.44 |
| Xylitol (1)                    | Sample not part of model population - no results | 0.00 |
| Xylitol (1)                    | Sample not part of model population - no results | 0.00 |
| Xylitol (1)                    | Sample not part of model population - no results | 0.00 |
| Xylitol (1)                    | Sample not part of model population - no results | 0.00 |
| Xylitol (1)                    | Sample not part of model population - no results | 0.00 |

|             |                                                  |      |
|-------------|--------------------------------------------------|------|
| Xylitol (2) | Sample not part of model population - no results | 0.00 |
| Xylitol (2) | Sample not part of model population - no results | 0.00 |
| Xylitol (2) | Sample not part of model population - no results | 0.00 |
| Xylitol (2) | Sample not part of model population - no results | 0.00 |
| Xylitol (2) | Sample not part of model population - no results | 0.00 |
